# Supplementary material for: Design of the Nationwide Nursery School Survey on Child Health Throughout the Great East Japan Earthquake
Source: PubMed Central journal article supplement (PMC4728121; doi:10.2188/jea.je20150073), 2016-02-05
Supplement: je-26-098-s002.pdf [file je-26-098-s002.pdf]

**Questionnaire B1**

Children who were born from April 2, 2004, to April 1, 2005

(Children in the 5-year-old class of 2010)

Nursery school personnel: please fill out one survey sheet per child.

**For children born in fiscal year 2004**

Please answer the following questions per child. Please circle the number or provide numbers or information in the underlined parts.

The date you filled out this questionnaire      2012 / month / day

- Sex                      1. Boy                      2. Girl
- Month of birth      year / month
- Presence of diseases diagnosed by medical doctors (as of October 2010)
  - 1. Unclear      2. None                      3. Yes

→ If you answered 'Yes' above, circle one or more below.

- a. Kidney disease      b. Heart disease                      c. Atopic dermatitis
- d. Bronchial asthma      e. Others (\_\_\_\_\_)
- History of moving-in and moving-out  
(Moving in from \_\_\_\_\_ prefecture \_\_\_\_\_ nursery school in year / month)  
(Moving out to \_\_\_\_\_ prefecture in year / month)
- Height and weight

|            | If you have records, please fill out. |             |             |             | Please fill out as many as possible. |             |             |             |
|------------|---------------------------------------|-------------|-------------|-------------|--------------------------------------|-------------|-------------|-------------|
|            | 2004<br>Apr                           | 2004<br>Oct | 2005<br>Apr | 2005<br>Oct | 2006<br>Apr                          | 2006<br>Oct | 2007<br>Apr | 2007<br>Oct |
| Height, cm |                                       |             |             |             |                                      |             |             |             |
| Weight, Kg |                                       |             |             |             |                                      |             |             |             |

|            | Please be sure to fill out.<br>(If you do not have complete data, please provide data you have.) |             |             |             |             |             |
|------------|--------------------------------------------------------------------------------------------------|-------------|-------------|-------------|-------------|-------------|
|            | 2008<br>Apr                                                                                      | 2008<br>Oct | 2009<br>Apr | 2009<br>Oct | 2010<br>Apr | 2010<br>Oct |
| Height, cm |                                                                                                  |             |             |             |             |             |
| Weight, Kg |                                                                                                  |             |             |             |             |             |

\*In case of moving in or moving out, please answer as completely as possible.

**Thank you for your cooperation.**

*Note: This version has not been verified for accuracy with the Japanese version.*
