# Supplementary material for: Design of the Nationwide Nursery School Survey on Child Health Throughout the Great East Japan Earthquake
Source: PubMed Central journal article supplement (PMC4728121; doi:10.2188/jea.je20150073), 2016-02-05
Supplement: je-26-098-s003.pdf [file je-26-098-s003.pdf]

**Questionnaire B2**

Children who were born from April 2, 2006, to April 1, 2007  
(Children in the 5-year-old class of 2012)

Nursery school personnel: please fill out one survey sheet per child.

**For children born in fiscal year 2006**

Please answer the following questions per child. Please circle the number or provide numbers or information in the underlined parts.

The date you filled out this questionnaire 2012 / month / day

- Sex 1. Boy 2. Girl
- Month of birth year / month
- Presence of diseases diagnosed by medical doctors (as of October 2012)  
1. Unclear 2. None 3. Yes

→ If you answered 'Yes' above, circle one or more below.

- a. Kidney disease b. Heart disease c. Atopic dermatitis
- d. Bronchial asthma e. Others (\_\_\_\_\_)

- History of moving-in and moving-out  
(Moving-in from \_\_\_\_\_ prefecture \_\_\_\_\_ nursery school in year / month)  
(Moving-out to \_\_\_\_\_ prefecture in year / month)

- Disaster experience and situation  
1. Did not experience the disaster 2. Experienced the disaster

→ If child experienced disaster, circle one or more below.

- a. Collapse of house b. Tsunami c. Fire d. Moving house
- b. Evacuation center f. Death of a family member

- Height and weight

|            | If you have records, please fill out. |             |             |             | Please fill out as many as possible. |             |             |             |
|------------|---------------------------------------|-------------|-------------|-------------|--------------------------------------|-------------|-------------|-------------|
|            | 2006<br>Apr                           | 2006<br>Oct | 2007<br>Apr | 2007<br>Oct | 2008<br>Apr                          | 2008<br>Oct | 2009<br>Apr | 2009<br>Oct |
| Height, cm |                                       |             |             |             |                                      |             |             |             |
| Weight, Kg |                                       |             |             |             |                                      |             |             |             |

|            | Please be sure to fill out.<br>(If you do not have complete data, please provide data you have.) |             |             |             |             |             |
|------------|--------------------------------------------------------------------------------------------------|-------------|-------------|-------------|-------------|-------------|
|            | 2010<br>Apr                                                                                      | 2010<br>Oct | 2011<br>Apr | 2011<br>Oct | 2012<br>Apr | 2012<br>Oct |
| Height, cm |                                                                                                  |             |             |             |             |             |
| Weight, Kg |                                                                                                  |             |             |             |             |             |

In case of moving in or moving out, please answer as completely as possible.

**Thank you for your cooperation.**

*Note: This version has not been verified for accuracy with the Japanese version.*
